# Supplementary material for: Unlocking the secrets of high-water barrier stereocomplex polylactide blend extrusion films
Source: Royal Society of Chemistry journal article supplement (doi:10.1039/d3gc04805e), 2024-01-01
Supplement: d3gc04805e1.pdf [file d3gc04805e1.pdf]

## Supporting Information

### **Unlocking the Secrets of High-Water Barrier Stereocomplex Poly lactide Blend Extrusion Films**

*James F. MACNAMARA Jr.<sup>a</sup>, Maria RUBINO<sup>a</sup>, Matthew DAUM<sup>a</sup>, Ajay KATHURIA<sup>b</sup>, Rafael AURAS<sup>a,\*</sup>*

<sup>a</sup> School of Packaging, Michigan State University, East Lansing, MI 48824-1223, USA

<sup>b</sup> Industrial Technology and Packaging, California Polytechnic State University, San Luis Obispo, CA, 93407-2311, USA

\*Corresponding author: [aurasraf@msu.edu](mailto:aurasraf@msu.edu)

#### **Table of contents**

**Figure S1.** a) TGA of PLLA (L130) and PDLA (D210) resin; b) DSC of PLLA (L130) and PDLA (D120) resin

**Figure S2.** UV transmission rate versus wavelength for the various films at a wavelength of 600 nm.

**Figure S3.** Tensile Strength of PLLA, blends, and PDLA in CD.

**Figure S4.** a) DSC of annealed PLLA-PDLA (85/15)-A-0,5,15,30 minutes; b) WAXD of annealed PLLA-PDLA 85/15)-A-0,5,15,30 minutes; c) DSC of annealed PLLA-PDLA (30/70)-A-0,5,15,30 minutes; d) WAXD of annealed PLLA-PDLA (30/70)-A-0,5,15,30 minutes. Note: In the WAXD figures, the dashed black lines represent  $\alpha$ -crystals. The dashed blue lines represent SC-crystals.

**Table S1.** Cast Film extrusion parameters used for processing.

**Table S2.** MFR of PLLA and PDLA resins.

**Table S3.** Physical properties of PLLA and PDLA resins used in the study.

**Table S4.** Tensile Stress and Strain of PLLA, PDLA and blends, MD, and CD, non-annealed. Values followed by a different letter are significantly different at  $P \leq 0.05$  (Tukey test).

## **S1. Processing conditions**

**Table S1** shows the processing conditions in which the film was extruded.

**Table S1.** Cast Film extrusion parameters used for processing.

| <b>Processing temperatures</b> | <b>Temperature (°C)</b> |
|--------------------------------|-------------------------|
| Zone 1                         | 210                     |
| Zone 2                         | 220                     |
| Zone 3                         | 230                     |
| Transfer tube                  | 230                     |
| Adapter                        | 230                     |
| Feedblock                      | 220                     |
| Die                            | 215                     |
| Chill Roll                     | 22                      |

  

| <b>Extrusion Settings</b> | <b>Speed (RPM)</b> |
|---------------------------|--------------------|
| Screw                     | 25                 |
| Chill roll speed          | 10 to 20           |

## S2. Resin Characterization

Table S2 shows the melt flow rate (MFR) of all four resins used in the study.

**Table S2.** MFR of PLLA and PDLA resins.

|                 | <b>Weight<br/>(g/30 sec)</b> | <b>MFR<br/>(g/10 min)</b> |                 | <b>Weight<br/>(g/30 sec)</b> | <b>MFR<br/>(g/10 min)</b> |
|-----------------|------------------------------|---------------------------|-----------------|------------------------------|---------------------------|
| PLLA - L130     | 0.653                        | 13.06                     | PDLA - D120     | 0.619                        | 12.38                     |
|                 | 0.629                        | 12.59                     |                 | 0.512                        | 10.24                     |
|                 | 0.609                        | 12.19                     |                 | 0.483                        | 9.66                      |
|                 | 0.754                        | 15.09                     |                 | 0.736                        | 14.72                     |
|                 | 0.584                        | 11.69                     |                 | 0.661                        | 13.22                     |
|                 | 0.753                        | 15.06                     |                 | 0.570                        | 11.39                     |
|                 | 0.610                        | 12.21                     |                 | 0.507                        | 10.13                     |
|                 | 0.595                        | 11.89                     |                 | 0.626                        | 12.52                     |
|                 | 0.582                        | 11.64                     |                 | 0.494                        | 9.89                      |
|                 | 0.565                        | 11.30                     |                 | 0.738                        | 14.76                     |
|                 | 0.554                        | 11.08                     |                 | 0.751                        | 15.01                     |
|                 | 0.507                        | 10.14                     |                 | 0.604                        | 12.09                     |
|                 | 0.487                        | 9.74                      |                 | 0.598                        | 11.96                     |
| <b>Average</b>  | <b>0.606</b>                 | <b>12.13</b>              | <b>Average</b>  | <b>0.608</b>                 | <b>12.15</b>              |
| <b>St. Dev.</b> | <b>0.064</b>                 | <b>1.53</b>               | <b>St. Dev.</b> | <b>0.090</b>                 | <b>1.81</b>               |

\*190° C and 2.16 kg weight

|                 | <b>Weight<br/>(g/30 sec)</b> | <b>MFR<br/>(g/10 min)</b> |                 | <b>Weight<br/>(g/30 sec)</b> | <b>MFR<br/>(g/10 min)</b> |
|-----------------|------------------------------|---------------------------|-----------------|------------------------------|---------------------------|
| PLLA - L175     | 0.170                        | 3.40                      | PDLA - D070     | 0.485                        | 9.69                      |
|                 | 0.182                        | 3.64                      |                 | 0.472                        | 9.43                      |
|                 | 0.150                        | 3.00                      |                 | 0.495                        | 9.89                      |
|                 | 0.181                        | 3.62                      |                 | 0.413                        | 8.26                      |
|                 | 0.191                        | 3.82                      |                 | 0.520                        | 10.40                     |
|                 | 0.157                        | 3.13                      |                 | 0.576                        | 11.52                     |
|                 | 0.191                        | 3.81                      |                 | 0.546                        | 10.92                     |
|                 | 0.181                        | 3.61                      |                 | 0.483                        | 9.65                      |
| <b>Average</b>  | <b>0.175</b>                 | <b>3.50</b>               | <b>Average</b>  | <b>0.499</b>                 | <b>9.97</b>               |
| <b>St. Dev.</b> | <b>0.014</b>                 | <b>0.28</b>               | <b>St. Dev.</b> | <b>0.046</b>                 | <b>0.93</b>               |

\*190° C and 2.16 kg weight

**Table S3** shows the study's thermal and physical properties of all four resins.

**Table S3.** Physical properties of PLLA and PDLA resins used in the study.

| <b>Thermal Properties</b> | PLLA<br>(L175) | n | PDLA (D070) | n |
|---------------------------|----------------|---|-------------|---|
| $T_{d,1\%}$ , °C          | 318 ± 5        | 3 | 314 ± 1     | 3 |
| $T_g$ , °C                | 78 ± 1         | 3 | 75 ± 0      | 3 |
| $T_m$ , °C                | 177 ± 1        | 3 | 177 ± 1     | 3 |
| $X_c$ , %                 | 37 ± 8         | 3 | 56 ± 19     | 3 |
| Melt Flow Rate, g/10 min  | 3.5 ± 0.3      | 8 | 10.0 ± 0.9  | 8 |

**Physical Properties**

|                            |            |   |            |   |
|----------------------------|------------|---|------------|---|
| Density, g/cm <sup>3</sup> | 1.25 ± 0.0 | 9 | 1.24 ± 0.0 | 9 |
| $M_w$ , kDa                | 157 ± 6    | 6 | 38 ± 3     | 6 |
| $M_n$ , kDa                | 87 ± 7     | 6 | 22 ± 2     | 6 |
| $\bar{D}$                  | 1.7 ± 0    | 6 | 1.8 ± 0.1  | 6 |

Note: n indicates the number of samples

| <b>Thermal Properties</b> | PLLA<br>(L130) | n  | PDLA (D120) | n  |
|---------------------------|----------------|----|-------------|----|
| $T_{d,1\%}$ , °C          | 303 ± 5        | 3  | 319 ± 5     | 3  |
| $T_g$ , °C                | 74 ± 1         | 3  | 72 ± 7      | 3  |
| $T_m$ , °C                | 176 ± 1        | 3  | 179 ± 1     | 3  |
| $X_c$ , %                 | 30 ± 1         | 3  | 30 ± 5      | 3  |
| Melt Flow Rate, g/10 min  | 12.1 ± 1.5     | 13 | 12.1 ± 1.8  | 13 |

**Physical Properties**

|                            |           |    |           |    |
|----------------------------|-----------|----|-----------|----|
| Density, g/cm <sup>3</sup> | 1.25 ± 0  | 19 | 1.25 ± 0  | 12 |
| $M_w$ , kDa                | 120 ± 0   | 6  | 101 ± 0   | 6  |
| $M_n$ , kDa                | 70 ± 1    | 6  | 59 ± 1    | 6  |
| $\bar{D}$                  | 1.7 ± 0.0 | 6  | 1.7 ± 0.0 | 6  |

Note: n indicates the number of samples

Figure S1 is the thermograms of the PLLA(L130) and PDLA(D120) resins used in the study.

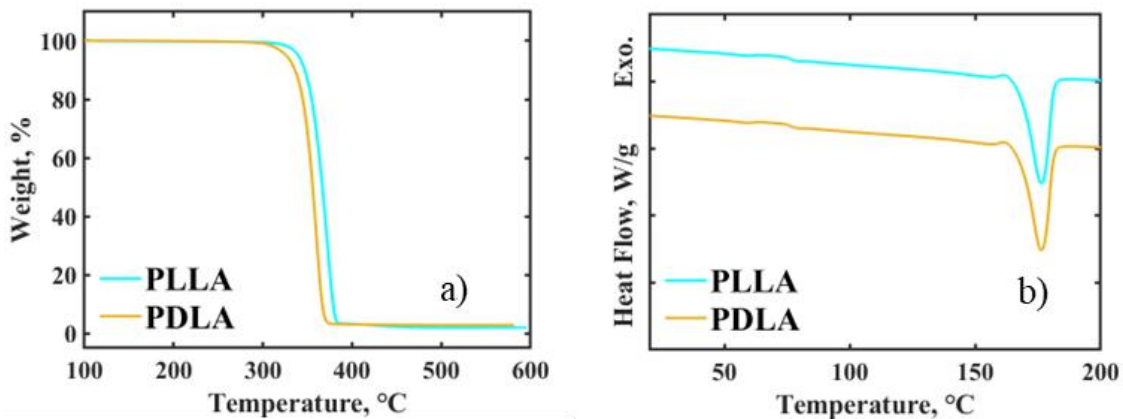

Figure S1. a) TGA of PLLA (L130) and PDLA (D210) resin; b) DSC of PLLA (L130) and PDLA (D120) resin

### S3. Films Characterization

Figure S2 is the UV transmission rate versus the wavelength for all the films produced.

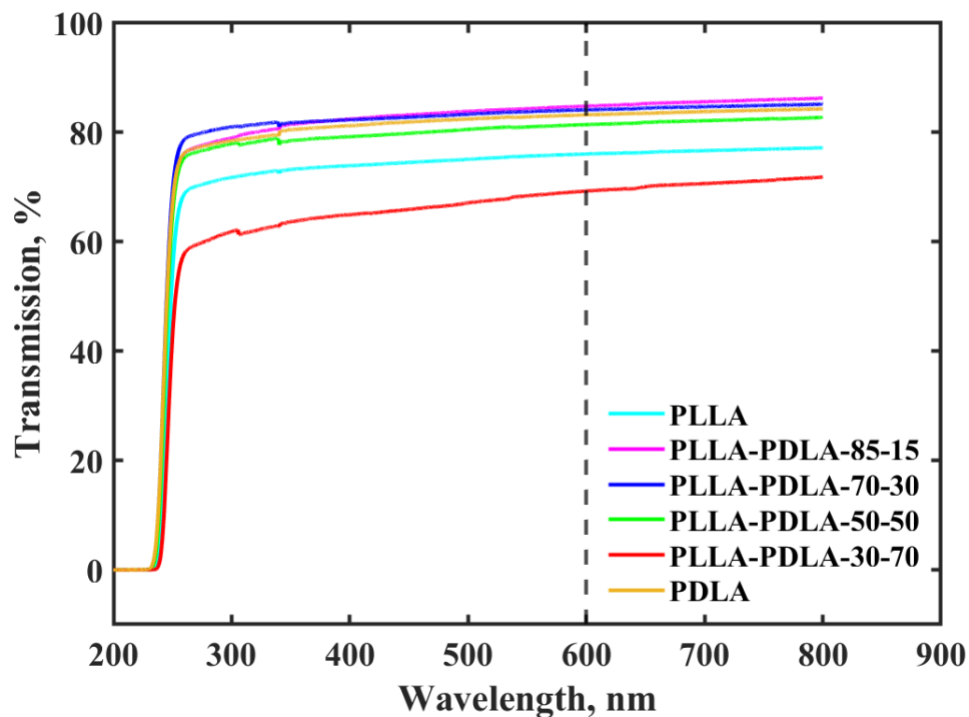

**Figure S2.** UV transmission rate versus wavelength for the various films at a wavelength of 600 nm.

**Figure S3** shows the Tensile Strength of PLLA, blends, and PDLA in CD.

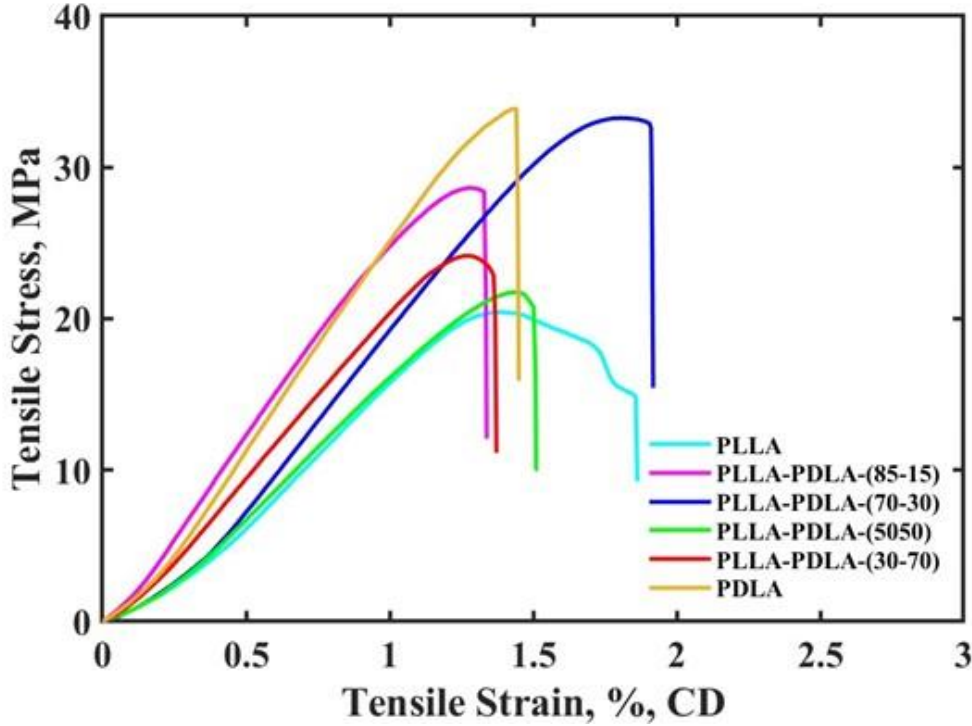

**Figure S3.** Tensile Strength of PLLA, blends, and PDLA in CD.

**Table S4** summarizes all the films' non-annealed tensile stress and strain.

**Table S4.** Tensile Stress and Strain of PLLA, PDLA and blends, MD, and CD, non-annealed. Values followed by a different letter are significantly different at  $P \leq 0.05$  (Tukey test).

| Material                          | Tensile stress at Maximum load |                             | Tensile strain at tensile strength |                            |
|-----------------------------------|--------------------------------|-----------------------------|------------------------------------|----------------------------|
|                                   | MD                             | CD                          | MD                                 | CD                         |
|                                   | MPa                            | MPa                         | %                                  | %                          |
| PLLA - L130-A160 - 0 minutes      | 36.18 ± 4.36 <sup>b</sup>      | 19.82 ± 1.96 <sup>e</sup>   | 2.33 ± 0.11 <sup>f</sup>           | 1.45 ± 0.14 <sup>g,h</sup> |
| PLLA/PDLA(85/15)-A160 - 0 minutes | 43.97 ± 4.94 <sup>a</sup>      | 28.77 ± 1.15 <sup>c,d</sup> | 2.42 ± 0.22 <sup>f</sup>           | 1.33 ± 0.10 <sup>g</sup>   |
| PLLA/PDLA(70/30)-A160 - 0 minutes | 35.49 ± 2.66 <sup>b</sup>      | 30.19 ± 3.93 <sup>c</sup>   | 2.34 ± 0.14 <sup>f</sup>           | 1.82 ± 0.16 <sup>i</sup>   |
| PLLA/PDLA(50/50)-A160 - 0 minutes | 33.43 ± 1.39 <sup>b</sup>      | 20.61 ± 1.70 <sup>e</sup>   | 2.25 ± 0.07 <sup>f</sup>           | 1.56 ± 0.10 <sup>h</sup>   |
| PLLA/PDLA(30/70)-A160 - 0 minutes | 33.19 ± 2.74 <sup>b</sup>      | 24.04 ± 1.47 <sup>d,e</sup> | 2.08 ± 0.35 <sup>f</sup>           | 1.33 ± 0.12 <sup>g</sup>   |
| PDLA - D120-A160 - 0 minutes      | 41.77 ± 3.05 <sup>a</sup>      | 32.65 ± 6.00 <sup>c</sup>   | 2.48 ± 0.24 <sup>f</sup>           | 1.44 ± 0.23 <sup>g,h</sup> |

Figure S4 shows the DSC and WAXD of the other blends, (85/15) and (30/70) PLLA/PDLA.

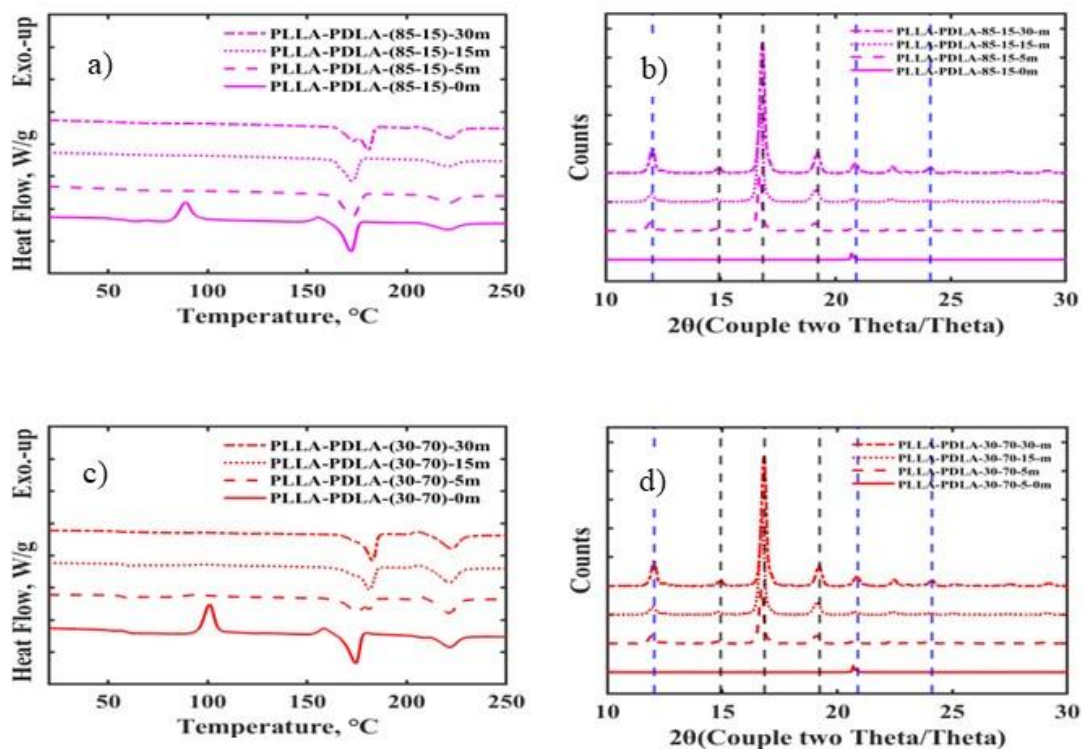

**Figure S4.** a) DSC of annealed PLLA-PDLA (85/15)-A-0,5,15,30 minutes; b) WAXD of annealed PLLA-PDLA 85/15)-A-0,5,15,30 minutes; c) DSC of annealed PLLA-PDLA (30/70)-A-0,5,15,30 minutes; d) WAXD of annealed PLLA-PDLA (30/70)-A-0,5,15,30 minutes. Note: In the WAXD figures, the dashed black lines represent  $\alpha$ -crystals. The dashed blue lines represent SC-crystals.
